# Supplementary material for: Distinct Groups of Low- and High-Fe Ferropericlase Inclusions in Super-Deep Diamonds: An Example from the Juina Area, Brazil
Source: MDPI journal article supplement (doi:10.3390/min13091217), 2023-09-15
Supplement: s1 [file s1]

Table S1. Chemical compositions of oxide, carbonate and silicate (?) inclusions in the studied lower-mantle diamonds from Rio Sorriso

| Sample                         | 1.2.1a | 1.2.1c | 1.2.1d | 1.2.2a                                              | 1.2.3b | 1.2.3c1 | 1.2.3c2 | 1.2.4b   | 1.2.4d   | 2.2.1 | 2.2.3a | 2.2.4 | 2.7.2a | 2.8.2 | 2.8.3 | 3.1.3b1  | 3.1.3b2  | 3.1.3b3  |
|--------------------------------|--------|--------|--------|-----------------------------------------------------|--------|---------|---------|----------|----------|-------|--------|-------|--------|-------|-------|----------|----------|----------|
| Mineral                        | fPer   | fPer   | fPer   | fPer                                                | fPer   | fPer    | fPer    | fPer     | fPer     | fPer  | fPer   | fPer  | fPer   | fPer  | fPer  | fPer     | fPer     | fPer     |
| Association                    |        |        |        | fPer+<br>CaSiO <sub>3</sub> +<br>CaTiO <sub>3</sub> |        |         |         | fPer+Mgs | fPer+Mgs |       |        |       |        |       |       | fPer+Brd | fPer+Brd | fPer+Brd |
| SiO <sub>2</sub>               | 0.08   | bdl.   | 0.02   | 0.05                                                | 0.01   | 0.06    | bdl     | 0.06     | 0.22     | bdl   | 0.06   | 0.04  | 0.01   | 0.20  | 0.07  | 0.02     | 0.04     | 0.01     |
| TiO <sub>2</sub>               | bdl    | 0.02   | 0.01   | 0.02                                                | bdl    | bdl     | 0.03    | 0.04     | 0.01     | bdl   | 0.01   | 0.00  | bdl    | 0.07  | 0.06  | 0.01     | bdl      | 0.01     |
| Al <sub>2</sub> O <sub>3</sub> | 0.02   | 0.08   | 0.04   | 0.04                                                | 0.05   | 0.06    | bdl     | 0.06     | 0.01     | 0.11  | 0.04   | 0.12  | 0.09   | 0.06  | 0.11  | 0.15     | 0.03     | 0.07     |
| Cr <sub>2</sub> O <sub>3</sub> | 0.15   | 0.16   | 0.16   | 0.15                                                | 0.17   | 0.14    | 0.14    | 0.20     | 0.18     | 0.54  | 0.53   | 0.54  | 0.56   | 0.19  | 0.19  | 0.75     | 0.34     | 1.03     |
| FeO                            | 34.03  | 57.54  | 57.80  | 59.06                                               | 59.37  | 59.47   | 59.66   | 46.67    | 51.96    | 35.25 | 35.88  | 34.36 | 30.25  | 39.21 | 39.82 | 33.74    | 25.41    | 25.88    |
| NiO                            | 1.05   | 0.18   | 0.19   | 0.22                                                | 0.23   | 0.21    | 0.21    | 0.33     | 0.20     | 1.15  | 1.18   | 1.20  | 1.22   | 0.11  | 0.22  | 1.11     | 1.26     | 1.27     |
| MnO                            | 0.30   | 0.35   | 0.35   | 0.37                                                | 0.43   | 0.42    | 0.32    | 0.22     | 0.15     | 0.27  | 0.29   | 0.29  | 0.43   | 0.89  | 0.65  | 0.49     | 0.27     | 0.27     |
| MgO                            | 63.65  | 42.00  | 42.39  | 38.44                                               | 40.07  | 39.06   | 39.11   | 51.57    | 45.34    | 61.23 | 60.52  | 63.05 | 66.17  | 55.84 | 52.63 | 62.29    | 72.50    | 69.47    |
| CaO                            | bdl    | 0.02   | bdl    | bdl                                                 | 0.01   | bdl     | 0.02    | bdl      | 0.03     | bdl   | bdl    | bdl   | 0.01   | 0.66  | 1.64  | 0.00     | 0.00     | 0.00     |
| Na <sub>2</sub> O              | 0.02   | Bdl    | 0.17   | 0.09                                                | 0.34   | 0.23    | 0.12    | 0.08     | 0.25     | 0.17  | 0.21   | 0.10  | 0.29   | 0.21  | 0.51  | 0.61     | 0.21     | 0.67     |
| K <sub>2</sub> O               | bdl    | bdl    | bdl    | bdl                                                 | 0.03   | bdl     | bdl     | 0.00     | 0.05     | 0.01  | 0.01   | 0.00  | 0.00   | 0.02  | 0.01  | 0.00     | 0.01     | bdl      |
| Total                          | 99.30  | 100.35 | 101.13 | 98.44                                               | 100.71 | 99.65   | 99.61   | 99.23    | 98.40    | 98.73 | 98.73  | 99.70 | 99.03  | 97.46 | 95.91 | 99.18    | 100.07   | 98.68    |
| fe#                            | 0.231  | 0.434  | 0.433  | 0.463                                               | 0.454  | 0.460   | 0.461   | 0.337    | 0.391    | 0.244 | 0.249  | 0.234 | 0.204  | 0.282 | 0.298 | 0.233    | 0.164    | 0.173    |
| mg#                            | 0.769  | 0.566  | 0.567  | 0.537                                               | 0.546  | 0.540   | 0.539   | 0.663    | 0.609    | 0.756 | 0.751  | 0.766 | 0.796  | 0.718 | 0.702 | 0.767    | 0.836    | 0.827    |

  

| Sample                         | 3.1.3b4  | 3.1.3b5  | 3.6.3a | 3.8.1d | 3.9.3b | 3.10.1a             | 3.10.1b | 1.5.2a | 3.1.3b | 1.2.2b1            | 1.2.2b2                                              | 2.2.2a                                                 | 2.2.3a                       | 2.2.3c                       | 1.2.4c   | 2.11.2a                            | 4.18.1                             |
|--------------------------------|----------|----------|--------|--------|--------|---------------------|---------|--------|--------|--------------------|------------------------------------------------------|--------------------------------------------------------|------------------------------|------------------------------|----------|------------------------------------|------------------------------------|
| Mineral                        | fPer     | fPer     | fPer   | fPer   | fPer   | fPer                | fPer    | Brd    | Brd    | CaSiO <sub>3</sub> | CaSiTiO <sub>3</sub>                                 | CaSiO <sub>3</sub>                                     | CaSiO <sub>3</sub>           | CaSiO <sub>3</sub>           | Mgs      | CaMgSi <sub>2</sub> O <sub>6</sub> | CaMgSi <sub>2</sub> O <sub>6</sub> |
| Association                    | fPer+Brd | fPer+Brd |        |        |        | fPer+<br>Merrillite |         |        |        | fPer+Brd           | CaSiO <sub>3</sub> +<br>CaTiO <sub>3</sub> +<br>fPer | CaSiTiO <sub>3</sub> +<br>CaSiO <sub>3</sub> +<br>fPer | CaSiO <sub>3</sub> +<br>fPer | CaSiO <sub>3</sub> +<br>fPer | Mgs+fPer |                                    |                                    |
| SiO <sub>2</sub>               | 0.02     | 0.01     | 0.07   | bdl    | 0.04   | 0.01                |         | 55.99  | 56.32  | 49.98              | 12.92                                                | 47.92                                                  | 51.58                        | 50.64                        | 0.04     | 53.77                              | 52.71                              |
| TiO <sub>2</sub>               | 0.01     | 0.00     | 0.08   | bdl    | 0.01   | 0.01                | 0.04    | 0.20   | 0.12   | bdl                | 40.28                                                | bdl                                                    | 0.04                         | 0.02                         | 0.00     | 0.06                               | bdl                                |
| Al <sub>2</sub> O <sub>3</sub> | 0.11     | 0.09     | 0.04   | bdl    | 0.03   | 0.12                | 0.14    | 2.25   | 1.26   | bdl                | 1.83                                                 | 0.59                                                   | 0.09                         | 0.06                         | 0.01     | 0.59                               | 0.32                               |
| Cr <sub>2</sub> O <sub>3</sub> | 1.02     | 1.00     | 0.08   | bdl    | 0.42   | 1.21                | 1.25    | 0.22   | 0.08   | bdl                | 1.33                                                 | bdl                                                    | 0.01                         | 0.02                         | 0.02     | 0.15                               | bdl                                |
| FeO                            | 26.16    | 24.58    | 48.05  | 32.73  | 32.65  | 62.86               | 61.48   | 5.94   | 4.91   | 0.35               | 0.51                                                 | 0.53                                                   | 0.28                         | 0.08                         | 2.76     | 2.75                               | 6.12                               |
| NiO                            | 1.28     | 1.36     | 0.23   | bdl    | 0.82   | 0.10                | 0.27    | bdl    | 0.01   | bdl                | bdl                                                  | bdl                                                    | 0.02                         | bdl                          | 0.05     | 0.01                               | bdl                                |
| MnO                            | 0.25     | 0.25     | 0.23   | 1.10   | 0.29   | 1.47                | 1.50    | 0.18   | 0.11   | bdl                | bdl                                                  | bdl                                                    | 0.03                         | 0.03                         | 0.12     | 0.06                               | bdl                                |
| MgO                            | 69.78    | 73.13    | 51.68  | 63.15  | 64.74  | 32.19               | 32.91   | 34.00  | 35.32  | 0.28               | bdl                                                  | bdl                                                    | bdl                          | bdl                          | 39.97    | 17.41                              | 13.08                              |
| CaO                            | 0.01     | 0.01     | 0.01   | bdl    | 0.01   | 0.01                | 0.00    | bdl    | 0.10   | 48.13              | 38.06                                                | 49.7                                                   | 47.44                        | 47.46                        | 1.29     | 23.48                              | 25.31                              |
| Na <sub>2</sub> O              | 0.64     | 0.26     | 0.03   | bdl    | 0.24   | 1.43                | 1.15    | bdl    | 0.07   | bdl                | bdl                                                  | bdl                                                    | 0.06                         | 0.02                         | 0.06     | 0.41                               | bdl                                |
| K <sub>2</sub> O               | bdl      | 0.01     | 0.01   | bdl    | bdl    | bdl                 | bdl     | bdl    | 0.02   | bdl                | bdl                                                  | bdl                                                    | 0.02                         | 0.00                         | 0.01     | 0.01                               | bdl                                |
| Total                          | 99.28    | 100.70   | 100.51 | 96.98  | 99.25  | 99.41               | 98.74   | 98.78  | 98.32  | 98.74              | 94.93                                                | 98.74                                                  | 99.56                        | 98.33                        | 44.32*   | 98.68                              | 97.55                              |
| fe#                            | 0.174    | 0.159    | 0.343  | 0.225  | 0.220  | 0.523               | 0.512   | 0.089  | 0.072  | -                  | -                                                    | -                                                      | -                            | -                            | -        | 0.081                              | 0.208                              |
| mg#                            | 0.826    | 0.841    | 0.657  | 0.775  | 0.780  | 0.477               | 0.488   | 0.911  | 0.928  | -                  | -                                                    | -                                                      | -                            | -                            | -        | 0.919                              | 0.792                              |

Note: bdl – below detection limit; \* - CO<sub>2</sub> not analyzed

Table S2. Isotopic composition of carbon in diamonds from Rio Sorriso

| Sample | $\delta^{13}\text{C}$ , ‰ VPDB |       |       |       |        |       |       |       |       | Aver  | Deviation | Primary mineral inclusion(s)      |
|--------|--------------------------------|-------|-------|-------|--------|-------|-------|-------|-------|-------|-----------|-----------------------------------|
|        | 1                              | 2     | 3     | 4     | 5      | 6     | 7     | 8     | 9     |       |           |                                   |
| 1.2.1  | -5.25                          | -5.96 | -5.37 |       |        |       |       |       |       | -5.53 | 0.38      | High-Ni fPer                      |
| 1.2.2  | -6.91                          | -5.16 | -5.22 |       |        |       |       |       |       | -5.76 | 0.99      | Low-Ni fPer + CaSiPrv<br>+CaTiPrv |
| 1.2.3  | -8.50                          | -9.90 | -6.65 | -9.36 | -10.48 | -8.76 |       |       |       | -8.94 | 1.34      | Low-Ni fPer                       |
| 1.3.1  | -6.37                          | -8.03 | -4.53 | -6.39 | -6.71  |       |       |       |       | -6.41 | 1.25      |                                   |
| 1.3.2  | -6.79                          | -8.68 | -7.66 | -6.46 | -5.83  |       |       |       |       | -7.08 | 1.11      |                                   |
| 1.4.2  | -6.46                          | -8.45 | -7.58 |       |        |       |       |       |       | -7.50 | 1.00      |                                   |
| 1.5.2  | -4.98                          | -6.03 | -6.40 | -5.64 | -5.28  | -5.96 |       |       |       | -5.72 | 0.52      | Brd                               |
| 2.2.1  | -6.14                          | -5.19 | -6.51 | -5.23 | -4.91  |       |       |       |       | -5.60 | 0.69      | High-Ni fPer                      |
| 2.2.2  | -5.13                          | -4.98 | -5.21 | -5.07 |        |       |       |       |       | -5.10 | 0.10      |                                   |
| 2.2.3  | -5.11                          | -6.63 | -5.69 | -5.01 |        |       |       |       |       | -5.61 | 0.74      | High-Ni fPer + CaSiPrv            |
| 2.2.4  | -5.19                          | -5.16 | -5.18 | -5.04 | -5.43  |       |       |       |       | -5.20 | 0.14      | High-Ni fPer                      |
| 2.3.1  | -5.60                          | -5.66 | -6.10 | -5.68 |        |       |       |       |       | -5.76 | 0.23      |                                   |
| 2.6.1  | -6.34                          | -6.68 | -5.68 | -5.81 |        |       |       |       |       | -6.11 | 0.41      |                                   |
| 2.6.2  | -6.31                          | -5.65 | -6.39 | -7.34 | -7.20  |       |       |       |       | -6.58 | 0.70      |                                   |
| 2.6.4  | -7.61                          | -5.83 | -5.58 |       |        |       |       |       |       | -6.34 | 1.11      |                                   |
| 2.6.5  | -6.97                          | -5.72 | -6.26 | -7.34 | -6.04  |       |       |       |       | -6.47 | 0.67      |                                   |
| 2.7.1  | -5.68                          | -5.08 | -4.69 | -5.74 |        |       |       |       |       | -5.30 | 0.50      |                                   |
| 2.7.2  | -5.26                          | -5.35 | -7.17 |       |        |       |       |       |       | -5.93 | 1.08      | High-Ni fPer                      |
| 2.8.3  | -7.06                          | -5.95 | -6.11 |       |        |       |       |       |       | -6.37 | 0.60      | Low-Ni fPer                       |
| 2.10.3 | -5.54                          | -5.79 | -4.77 | -5.56 | -4.60  |       |       |       |       | -5.25 | 0.53      |                                   |
| 2.11.2 | -4.82                          | -5.44 |       |       |        |       |       |       |       | -5.13 | 0.44      | Di?                               |
| 3.1.2  | -9.48                          | -5.23 | -8.51 | -7.61 | -7.22  | -7.90 | -6.44 | -8.23 |       | -7.58 | 1.31      |                                   |
| 3.2.2  | -5.63                          | -7.00 | -6.71 | -5.98 | -7.62  | -6.23 | -5.30 | -7.48 | -6.02 | -6.44 | 0.81      | High-Ni fPer                      |
| 3.2.3  | -5.38                          | -6.24 | -5.28 | -6.33 |        |       |       |       |       | -5.81 | 0.55      |                                   |
| 3.4.1  | -5.76                          | -6.15 | -4.89 | -5.15 |        |       |       |       |       | -5.49 | 0.57      |                                   |
| 3.5.2  | -4.83                          | -5.27 | -6.07 | -7.25 | -5.47  | -5.36 | -4.60 | -5.14 |       | -5.50 | 0.83      | High-Ni fPer + Brd                |
| 3.5.4  | -7.45                          | -6.53 | -8.08 | -5.95 | -5.45  |       |       |       |       | -6.69 | 1.07      |                                   |
| 3.5.5  | -5.08                          | -5.68 | -6.56 | -5.23 | -5.49  |       |       |       |       | -5.61 | 0.58      |                                   |
| 3.6.1  | -5.17                          | -5.94 | -5.56 | -6.50 |        |       |       |       |       | -5.79 | 0.57      |                                   |
| 3.6.2  | -5.18                          | -5.49 | -6.02 | -5.18 | -5.26  | -5.17 | -5.47 |       |       | -5.56 | 0.54      | Tuite                             |
| 3.6.3  | -8.17                          | -6.94 |       |       |        |       |       |       |       | -7.56 | 0.87      | Low-Ni fPer                       |
| 3.9.2  | -5.83                          | -7.94 | -8.21 |       |        |       |       |       |       | -8.08 | 0.19      |                                   |
| 3.9.3  | -6.21                          | -6.30 | -6.46 | -5.99 | -5.78  |       |       |       |       | -6.15 | 0.27      | High-Ni fPer                      |

|        |        |        |        |        |       |        |       |       |  |        |      |                      |
|--------|--------|--------|--------|--------|-------|--------|-------|-------|--|--------|------|----------------------|
| 3.9.4  | -5.34  | -5.01  | -4.89  | -5.97  | -4.94 |        |       |       |  | -5.23  | 0.45 |                      |
| 3.10.1 | -6.50  | -6.81  | -6.79  |        |       |        |       |       |  | -6.70  | 0.17 | Low-Ni fPer          |
| 3.10.2 | -4.88  | -5.68  | -5.59  | -5.67  | -6.13 |        |       |       |  | -5.59  | 0.45 | High-Ni fPer + Tuite |
| 4.3.2  | -7.12  | -5.81  | -6.28  | -6.94  |       |        |       |       |  | -6.54  | 0.60 |                      |
| 4.6.1  | -4.73  | -5.35  | -5.18  | -5.50  |       |        |       |       |  | -5.19  | 0.33 |                      |
| 4.11.1 | -8.27  | -9.43  | -7.49  | -9.12  | -6.16 |        |       |       |  | -8.09  | 1.32 |                      |
| 4.16.1 | -7.28  | -7.84  | -5.92  | -6.19  | -6.67 |        |       |       |  | -6.78  | 0.79 |                      |
| 4.18.3 | -5.34  | -5.39  | -5.65  | -5.67  |       |        |       |       |  | -5.51  | 0.17 |                      |
| 6.2.1  | -4.72  | -6.10  | -5.86  | -6.80  | -5.81 |        |       |       |  | -5.86  | 0.75 |                      |
| 6.3.1  | -12.00 | -15.03 | -13.61 | -10.00 | -9.58 | -11.96 | -9.45 | -9.62 |  | -11.41 | 2.10 |                      |
| 6.6.1  | -4.85  | -4.64  | -5.20  | -5.20  | -5.34 |        |       |       |  | -5.05  | 0.29 |                      |
| 6.7.1  | -10.44 | -7.85  | -10.48 | -6.86  | -6.85 |        |       |       |  | -8.50  | 1.84 |                      |
| 6.8.1  | -8.91  | -8.01  | -8.09  | -8.29  |       |        |       |       |  | -8.33  | 0.41 |                      |

---
